# Supplementary material for: Developing target product profiles for Neisseria gonorrhoeae diagnostics in the context of antimicrobial resistance: An expert consensus
Source: PubMed Central journal article supplement (PMC7462286; doi:10.1371/journal.pone.0237424), 2020-09-01
Supplement: pone.0237424.s001.pdf [file pone.0237424.s001.pdf]

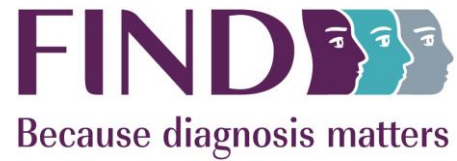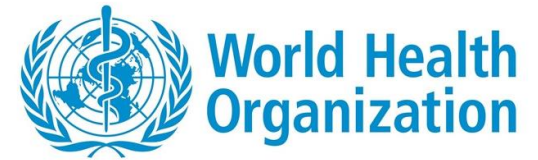

**Target product profile  
for a rapid, low-cost diagnostic to distinguish  
gonorrhoea from Chlamydia infection at primary care**

---

FIND, Campus Biotech. Chemin des Mines 9, 1202 Geneva, Switzerland  
T +41 (0)22 710 05 90, F +41 (0)22 710 05 99, [www.finddx.org](http://www.finddx.org)

## Target product profile for a rapid, low-cost diagnostic to distinguish gonorrhoea from Chlamydia infection at primary care

| Characteristic                     | Minimal                                                                                                                                                                                                                                                                                                                                  | Optimal                                                                                                                                      |
|------------------------------------|------------------------------------------------------------------------------------------------------------------------------------------------------------------------------------------------------------------------------------------------------------------------------------------------------------------------------------------|----------------------------------------------------------------------------------------------------------------------------------------------|
| <b>SCOPE</b>                       |                                                                                                                                                                                                                                                                                                                                          |                                                                                                                                              |
| <b>1. Intended use</b>             | To detect <i>Neisseria gonorrhoea</i> (NG) only or NG and <i>Chlamydia trachomatis</i> (CT) infection to improve syndromic patient management and to facilitate appropriate antibiotic use                                                                                                                                               | Same as minimum plus to assist in screening to identify previously undetected NG or NG and CT infections to support public health management |
| <b>2. Target use setting</b>       | Primary health care settings including health posts (Level 1 <sup>1</sup> ); to be used after initial clinical evaluation (referring to Step 2 in the WHO Vaginal/Urethral Discharge Flowchart <sup>2</sup> ) to guide treatment decision                                                                                                |                                                                                                                                              |
| <b>3. Test format / Equipment</b>  | A non-instrumented, single use, disposable diagnostic test preferred; Ideally no additional power required for operation, but if required, battery power with 8-hour operation between charges.<br><br>Reader optional and only appropriate if its inclusion supports enhanced test performance (see Appendix 1 for reader requirements) |                                                                                                                                              |
| <b>4. Target users</b>             | The target users include community health workers with minimal training and any health worker with a similar or superior training level                                                                                                                                                                                                  |                                                                                                                                              |
| <b>5. Target analytes</b>          | Identification of NG or NG and CT                                                                                                                                                                                                                                                                                                        | Same as minimal, plus detection additional sexually transmitted infections (e.g. <i>Mycoplasma</i> and <i>trichomonas</i> ) ideal            |
| <b>PERFORMANCE CHARACTERISTICS</b> |                                                                                                                                                                                                                                                                                                                                          |                                                                                                                                              |

<sup>1</sup> Ghani AC, Burgess DH, Reynolds A, Rousseau C (2015). Expanding the role of diagnostic and prognostic tools for infectious diseases in resource-poor settings. *Nature* 528: S50-52

<sup>2</sup> [https://apps.who.int/iris/bitstream/handle/10665/43275/9241593407\\_mod4\\_eng.pdf?sequence=5&isAllowed=y](https://apps.who.int/iris/bitstream/handle/10665/43275/9241593407_mod4_eng.pdf?sequence=5&isAllowed=y)

|                                                                                         |                                                                                                                                                                                                                   |                                                                                                                                                                                                                                            |
|-----------------------------------------------------------------------------------------|-------------------------------------------------------------------------------------------------------------------------------------------------------------------------------------------------------------------|--------------------------------------------------------------------------------------------------------------------------------------------------------------------------------------------------------------------------------------------|
| <b>6. Clinical Sensitivity<sup>3</sup></b>                                              | >80% required to achieve the minimal intended use for a non-molecular test;<br>>90% required to achieve the minimal intended use for a molecular test                                                             | >90% required to achieve the minimal intended use for a non-molecular test;<br>>95% required to achieve the minimal intended use for a molecular test                                                                                      |
| <b>7. Clinical Specificity<sup>1</sup></b>                                              | >95% required to achieve the minimal intended use                                                                                                                                                                 | >98% required to achieve the optimal intended use                                                                                                                                                                                          |
| <b>8. Specimen<sup>4</sup></b>                                                          | Women: self-collected and provider-collected high vaginal swabs<br>Men: urethral swab acceptable, urine preferred<br>Same test format able to accept multiple specimen types to achieve results for men and women | Women: urine preferred, self-collected and provider-collected high vaginal swabs acceptable<br>Men: urine, and rectal and pharyngeal swabs<br>Same test format able to accept multiple specimen types to achieve results for men and women |
| <b>9. Analytical Inclusivity</b>                                                        | Assay detects geographically and genetically representative Neisseria gonorrhoea strains                                                                                                                          |                                                                                                                                                                                                                                            |
| <b>10. Analytical Exclusivity</b>                                                       | No cross-reactivity with >95% of non-chlamydial and non-gonococcal pathogens and other microorganisms that frequently colonize and/or infect the genital tract especially non-gonorrhoeal Neisseria               | No cross-reactivity with >99% of non-chlamydial and non-gonococcal pathogens and other microorganisms that frequently colonize and/or infect the genital tract especially non-gonorrhoeal Neisseria                                        |
| <b>OPERATIONAL CHARACTERISTICS</b>                                                      |                                                                                                                                                                                                                   |                                                                                                                                                                                                                                            |
| <b>11. Specimen preparation</b>                                                         | Minimal sample processing; no more than one operator step                                                                                                                                                         | Integrated; no sample preparation required by user                                                                                                                                                                                         |
| <b>12. Steps performed by healthcare worker between specimen preparation and result</b> | No more than three operator steps, none of which is timed or labour intensive                                                                                                                                     | One operator step (none of which has a timed interval), excluding waste disposal                                                                                                                                                           |
| <b>13. Additional consumables required but not provided within the test kit</b>         | None, except for specimen collection                                                                                                                                                                              |                                                                                                                                                                                                                                            |

<sup>3</sup> In genital specimens with performance verified as compared to nucleic acid reference standard

<sup>4</sup> Sensitivity and specificity for rectal and pharyngeal swabs is not yet determined

|                                                                                                          |                                                                                                                                                                                                                                                                                                                               |                                                                                                                                                           |
|----------------------------------------------------------------------------------------------------------|-------------------------------------------------------------------------------------------------------------------------------------------------------------------------------------------------------------------------------------------------------------------------------------------------------------------------------|-----------------------------------------------------------------------------------------------------------------------------------------------------------|
| <b>14. Cold chain</b>                                                                                    | None required at any point                                                                                                                                                                                                                                                                                                    |                                                                                                                                                           |
| <b>15. Test kit</b>                                                                                      | All materials required for test procedure, including devices, reagents or other consumables to diagnose one individual, included in packaged, self-contained kit (either packaged individually as one test per test kit or sufficient to perform the number of tests packaged in the test kit box – e.g. 20, 50 or 100 tests) |                                                                                                                                                           |
| <b>16. Test kit stability and storage conditions</b>                                                     | 12 months, stable between 2-35°C, 70% humidity, 3000 meters altitude                                                                                                                                                                                                                                                          | 18 months, stable between 0-50°C, 90% humidity, 3000 meters altitude                                                                                      |
| <b>17. Environmental tolerance of packaged test kit</b>                                                  | <ul style="list-style-type: none"> <li>• Transport stress (48 hours with fluctuations up to 50 °C and down to 0 °C)</li> <li>• Tolerate exposures between 2 °C and 45 °C at an altitude up to 3000 meters, up to and including condensing humidity</li> </ul>                                                                 |                                                                                                                                                           |
| <b>18. Operating conditions</b>                                                                          | <ul style="list-style-type: none"> <li>• Operation between 15 °C and 40 °C at an altitude up to 2000 meters</li> <li>• Extremely low relative humidity to condensing humidity</li> <li>• Result interpretation in low light settings</li> </ul>                                                                               | Same, plus operation between 10 °C and 45 °C at an altitude up to 3000 meters preferred                                                                   |
| <b>19. Training required</b>                                                                             | < 90 minutes                                                                                                                                                                                                                                                                                                                  | 30 minutes                                                                                                                                                |
| <b>20. Clean water</b>                                                                                   | None required                                                                                                                                                                                                                                                                                                                 |                                                                                                                                                           |
| <b>21. Time to result</b>                                                                                | ≤30 minutes                                                                                                                                                                                                                                                                                                                   | ≤10 minutes                                                                                                                                               |
| <b>22. Duration of sample stability (time from specimen collection to insertion into test cartridge)</b> | Immediate testing of the sample                                                                                                                                                                                                                                                                                               |                                                                                                                                                           |
| <b>23. Stability of valid result (read window)</b>                                                       | At least 30 minutes (after which results may be <i>false</i> or <i>invalid</i> );<br>Clear language in the instructions for use regarding test reading                                                                                                                                                                        | ≥1 hour (after which results give <i>invalid</i> rather than <i>false</i> results);<br>Clear language in the instructions for use regarding test reading  |
| <b>24. Safety precautions (bio-safety requirements)</b>                                                  | Closed, self-contained system; unprocessed sample transfer only; no open handling of biohazardous material                                                                                                                                                                                                                    |                                                                                                                                                           |
| <b>25. Waste/disposal requirements</b>                                                                   | Standard biohazardous waste disposal or incineration of consumables, no high temperature incineration required                                                                                                                                                                                                                | Small environmental footprint; recyclable or compostable plastics for test cartridges and other materials after decontamination, no incineration required |

|                                                                                    |                                                                                                                                                                                                                                                                                                                                                               |                                                                                                                                                                                                   |
|------------------------------------------------------------------------------------|---------------------------------------------------------------------------------------------------------------------------------------------------------------------------------------------------------------------------------------------------------------------------------------------------------------------------------------------------------------|---------------------------------------------------------------------------------------------------------------------------------------------------------------------------------------------------|
| <b>26. Internal QC - reagents</b>                                                  | Procedural (reagent-addition) control internalized in cartridge for each individual test run; positive and/or negative control for internal QC available for purchase separately                                                                                                                                                                              | Procedural (specimen-addition/sample adequacy) control internalized in cartridge for each individual test run; positive and/or negative control for internal QC provided in each box of test kits |
| <b>27. Device control</b>                                                          | Indicator of instability or expiration                                                                                                                                                                                                                                                                                                                        | Indicator of instability, expiration, inadequate sample and incorrect procedure and/or use but not as an additional component                                                                     |
| <b>28. Patient identification capability</b>                                       | Yes – simple, self-contained way to indicate a patient identifier                                                                                                                                                                                                                                                                                             |                                                                                                                                                                                                   |
| <b>29. Result display and interpretation</b>                                       | Result can be read with the naked eye with minimal instructions for interpretation required by user, or with an integrated reader (See Appendix 1) that supports enhanced test performance                                                                                                                                                                    |                                                                                                                                                                                                   |
| <b>PRICING AND ACCESSIBILITY</b>                                                   |                                                                                                                                                                                                                                                                                                                                                               |                                                                                                                                                                                                   |
| <b>30. Target list price<sup>5</sup> per test (excluding the cost of a reader)</b> | <\$3 USD for a low complexity test (e.g. rapid diagnostic test) that meets the minimal intended use and clinical sensitivity and specificity TPP specifications;<br><\$12 USD for a moderate/high complexity test (e.g. disposable single use molecular test) that meets the optimal intended use and clinical sensitivity and specificity TPP specifications |                                                                                                                                                                                                   |
| <b>31. Regulatory requirements</b>                                                 | WHO PQ or other stringent regulatory body (e.g. FDA or CE mark)                                                                                                                                                                                                                                                                                               |                                                                                                                                                                                                   |

## Appendix 1: Requirements for RDT reader (if required)

Adapted from RDT reader TPP prepared by the Murtagh Group, LLC (2014)

| <b>READER CHARACTERISTICS (if reader is required)</b> | <b>Minimal</b>                                                                                                                                                                                              | <b>Optimal</b> |
|-------------------------------------------------------|-------------------------------------------------------------------------------------------------------------------------------------------------------------------------------------------------------------|----------------|
| <b>1. Ease of Use</b>                                 | No more than 3 operator steps (position RDT (cassette/strip) as required by the reader; take image or scan; read result); simple test menu; integrated LCD screen; simple key pad or touchscreen with icons |                |
| <b>2. Size</b>                                        | Small, portable table-top or hand-held device; or disposable reader                                                                                                                                         |                |

<sup>5</sup> List Price– the price the manufacturer has arrived at for the product, taking into account the cost of goods and other factors (e.g., margin); the list price does not include any volume or other discounts or potential markup for distribution or other costs, including freight, taxes, etc. This cost is assumed a volume production and the prices listed in the TPP are considered for public health preferential pricing in low- and middle-income countries only.

|                                                 |                                                                                                                                                                                                                                                                                                                         |                                                                                                                                                                                                                                                                                                                                                                                                                                                                                                                                                                               |
|-------------------------------------------------|-------------------------------------------------------------------------------------------------------------------------------------------------------------------------------------------------------------------------------------------------------------------------------------------------------------------------|-------------------------------------------------------------------------------------------------------------------------------------------------------------------------------------------------------------------------------------------------------------------------------------------------------------------------------------------------------------------------------------------------------------------------------------------------------------------------------------------------------------------------------------------------------------------------------|
| <b>3. Power Requirements</b>                    | Standard AA/AAA batteries or rechargeable battery with 8-hour operation between charges. Rechargeable battery lifetime > 2 years and less than \$50 USD                                                                                                                                                                 |                                                                                                                                                                                                                                                                                                                                                                                                                                                                                                                                                                               |
| <b>4. Service, Maintenance and Calibration</b>  | Routine preventive maintenance no more than 30 minutes 1x per week (with hands on time <10 minutes). Mean time between failures of at least 36 months or 30,000 tests, whichever occurs first. Self-check alerts operator to reader errors or warnings; and ability to be calibrated remotely, or no calibration needed |                                                                                                                                                                                                                                                                                                                                                                                                                                                                                                                                                                               |
| <b>5. Patient Identification Capability</b>     | Manual entry of alphanumeric patient identifier keypad or touchscreen compatible with protective gloves                                                                                                                                                                                                                 | Same, plus bar code, RFID or other reader                                                                                                                                                                                                                                                                                                                                                                                                                                                                                                                                     |
| <b>6. Result display; result interpretation</b> | Easy pictorial display: positive, negative, or invalid for each target analyte; no instructions for interpretation required                                                                                                                                                                                             |                                                                                                                                                                                                                                                                                                                                                                                                                                                                                                                                                                               |
| <b>7. Data acquisition and display</b>          | Able to add information (patient ID, operator ID, date, location, etc.); able to store patient results; able to print out results utilizing commoditized paper products (i.e. standard paper specifications and sizes)                                                                                                  |                                                                                                                                                                                                                                                                                                                                                                                                                                                                                                                                                                               |
| <b>8. Connectivity</b>                          | Reader has integrated global positioning system (GPS) module                                                                                                                                                                                                                                                            | If combined with a reader, internally integrated GPS/ general packet radio service (GPRS) module and conformity with HL7 messaging standards                                                                                                                                                                                                                                                                                                                                                                                                                                  |
| <b>9. Data export</b>                           | Full data export over mobile phone network                                                                                                                                                                                                                                                                              | Full data export over mobile phone network (data transmission can automatically select between GPRS or more advanced networks and global system for mobile communication (GSM), based on available coverage)<br><br>GPRS should be able to utilize the internet file transfer protocol to transmit data: data transfer should be initiated every 6–12 hours automatically by the reader; data can be exported in a format compatible with HL7 standards, where appropriate; instrument tracks and transmits quality assurance data over time (e.g. identify shifts or trends) |
| <b>10. Regulatory Requirements</b>              | GMP compliant, ISO 13485:2016 certified and authorized for use by a stringent regulatory authority                                                                                                                                                                                                                      |                                                                                                                                                                                                                                                                                                                                                                                                                                                                                                                                                                               |
| <b>11. Cost of Reader</b>                       | Reader cost included in the list price of the test                                                                                                                                                                                                                                                                      |                                                                                                                                                                                                                                                                                                                                                                                                                                                                                                                                                                               |

**Note:** Some common characteristics for POCTs were defined using the WHO NG TPP previously developed, located here: <http://www.who.int/reproductivehealth/topics/rtis/pocts/en/>
